# Supplementary material for: Drosophila RpS12 controls translation, growth, and cell competition through Xrp1
Source: PubMed Central journal article supplement (PMC6936874; doi:10.1371/journal.pgen.1008513), 2019-12-16
Supplement: pgen.1008513.s002.pdf [file pgen.1008513.s002.pdf]

| gene             | Pathway  | <i>rpS12</i> <sup>D97</sup> | <i>RpS17</i> <sup>+/-</sup> | <i>RpS3</i> <sup>+/-</sup> |
|------------------|----------|-----------------------------|-----------------------------|----------------------------|
| brk              | Dpp      | 1.04                        | 1.01                        | 0.98                       |
| tkv              | Dpp      | 1.00                        | 1.08                        | 0.96                       |
| nkd              | Wg       | 0.97                        | 1.13                        | 0.97                       |
| Fz3              | Wg       | 1.07                        | 0.98                        | 0.96                       |
| Ptc              | Hh       | 1.00                        | 0.98                        | 0.96                       |
| aos              | Ras      | 0.97                        | 1.11                        | 1.04                       |
| E(spl)m $\beta$  | N        | 1.17                        | 0.93                        | 0.82                       |
| E(spl)m $\gamma$ | N        | 1.46                        | 1.19                        | 1.32                       |
| E(spl)m $\delta$ | N        | 1.12                        | 1.13                        | 0.89                       |
| E(spl)m3         | N        | 1.14                        | <b>0.79</b>                 | <b>0.64</b>                |
| E(spl)m5         | N        | 0.79                        | 1.28                        | 0.55                       |
| E(spl)m7         | N        | 1.16                        | 0.89                        | 0.68                       |
| E(spl)m8         | N        | 1.4                         | 0.92                        | 0.74                       |
| Socs36E          | Jak/Stat | 0.99                        | <b>1.47</b>                 | <b>1.28</b>                |
| chinmo           | Jak/Stat | 1.59                        | 0.91                        | 1.29                       |
| puc              | Jnk      | 1.01                        | 1.19                        | 1.08                       |
| Mmp1             | Jnk      | 1.12                        | <b>1.64</b>                 | <b>1.32</b>                |
| ex               | SWH      | 1.10                        | 1.14                        | 1.06                       |
| Diap1            | SWH      | 1.05                        | <b>1.22</b>                 | 1.02                       |
