# Supplementary material for: Drosophila RpS12 controls translation, growth, and cell competition through Xrp1
Source: PubMed Central journal article supplement (PMC6936874; doi:10.1371/journal.pgen.1008513), 2019-12-16
Supplement: pgen.1008513.s003.pdf [file pgen.1008513.s003.pdf]

Transcription factor motifs enriched in introns and upstream region (5kb) of Rp-regulated genes (NES>3)

| TF      | NES     | # Targets | # Motifs/Tracks |
|---------|---------|-----------|-----------------|
| Xrp1    | 5.2941  | 55        | 10              |
| Blimp-1 | 5.21899 | 45        | 18              |
| Hsf     | 5.12023 | 63        | 13              |
| lola    | 4.63761 | 47        | 3               |
| CG9727  | 4.02362 | 19        | 6               |
| grh     | 3.75515 | 57        | 4               |
| Dip3    | 3.73948 | 23        | 3               |
| slbo    | 3.71839 | 24        | 2               |
| crp     | 3.56945 | 37        | 5               |
| maf-S   | 3.24919 | 15        | 3               |
| pnr     | 3.23289 | 44        | 8               |
| Optix   | 3.08171 | 29        | 2               |
| Hr38    | 3.05103 | 40        | 3               |
| schlank | 3.04975 | 11        | 1               |

Transcription factor motifs enriched in 5' UTR, first intron, and upstream region (5kb) of Rp-regulated genes (NES>3)

| TF          | NES            | # Targets | # Motifs/Tracks |
|-------------|----------------|-----------|-----------------|
| Blimp-1     | 5.53166        | 33        | 5               |
| lola        | 5.44284        | 48        | 4               |
| crp         | 5.3291         | 35        | 6               |
| <b>Xrp1</b> | <b>4.66517</b> | <b>53</b> | <b>15</b>       |
| CG6272      | 4.39951        | 41        | 6               |
| slbo        | 4.3959         | 46        | 3               |
| grh         | 4.19133        | 61        | 6               |
| E2f         | 4.14712        | 57        | 2               |
| ewg         | 4.04062        | 33        | 3               |
| sqz         | 3.82802        | 19        | 4               |
| CG9727      | 3.75688        | 15        | 2               |
| Pur-alpha   | 3.65641        | 21        | 3               |
| Side        | 3.43576        | 36        | 4               |
| cnc         | 3.32524        | 35        | 4               |
| Atf3        | 3.26375        | 30        | 3               |
| prd         | 3.1042         | 17        | 2               |
| Tbp         | 3.09697        | 22        | 4               |
| ERR         | 3.05356        | 32        | 6               |
| CG17829     | 3.03347        | 17        | 1               |

Rp-regulated genes with Xrp1-binding motifs according to one or both analyses

|         |         |         |          |         |         |
|---------|---------|---------|----------|---------|---------|
| Ady43A  | amd     | baz     | beat-IIb | cac     | Cda5    |
| CG1090  | CG12099 | CG12384 | CG13258  | CG13579 | CG13731 |
| CG14291 | CG14304 | CG15080 | CG15784  | CG1673  | CG18547 |
| CG2781  | CG3036  | CG31140 | CG3168   | CG32512 | CG32694 |
| CG33158 | CG33494 | CG34382 | CG3726   | CG3902  | CG4858  |
